# Supplementary material for: Novel oligopeptide nanoprobe for targeted cancer cell imaging
Source: Royal Society of Chemistry journal article supplement (doi:10.1039/c8ra06034g), 2018-01-01
Supplement: c8ra06034g1.pdf [file c8ra06034g1.pdf]

**Electronic Supplementary Material (ESI) for RSC Advances.  
This journal is © The Royal Society of Chemistry 2018**

**Supplementary Information**

**Novel oligopeptide nanoprobe for targeted cancer cell imaging**

Wen-Qiang Ding,<sup>a</sup> Si-Yong Qin,<sup>\*,a</sup> Yin-Jia Cheng,<sup>a</sup> Yi-Han Ma<sup>a</sup> and Ai-Qing  
Zhang<sup>\*,a</sup>

<sup>a</sup>College of Chemistry and Materials Science, South-Central University for  
Nationalities, Wuhan 430074, P. R. China.

E-mail: sy-qin@mail.scuec.edu.cn; aizhang@scuec.edu.cn.

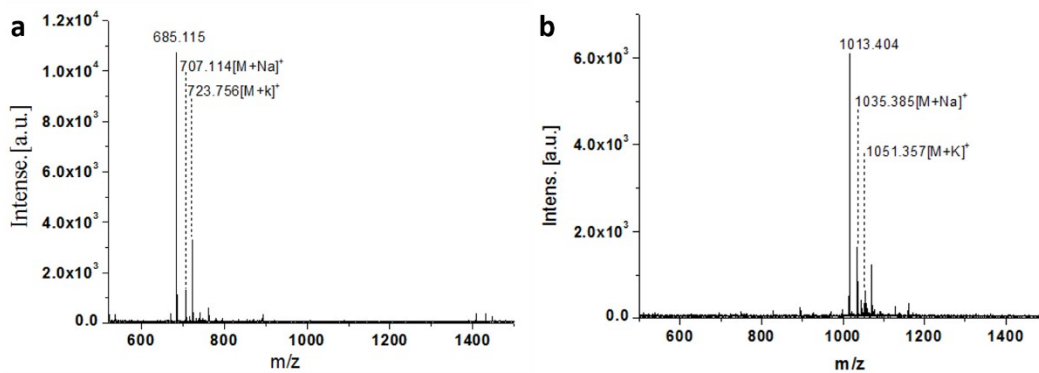

**Fig. S1** The MALDI-TOF-MS of WFFW (a) and RGDWFFW (b).

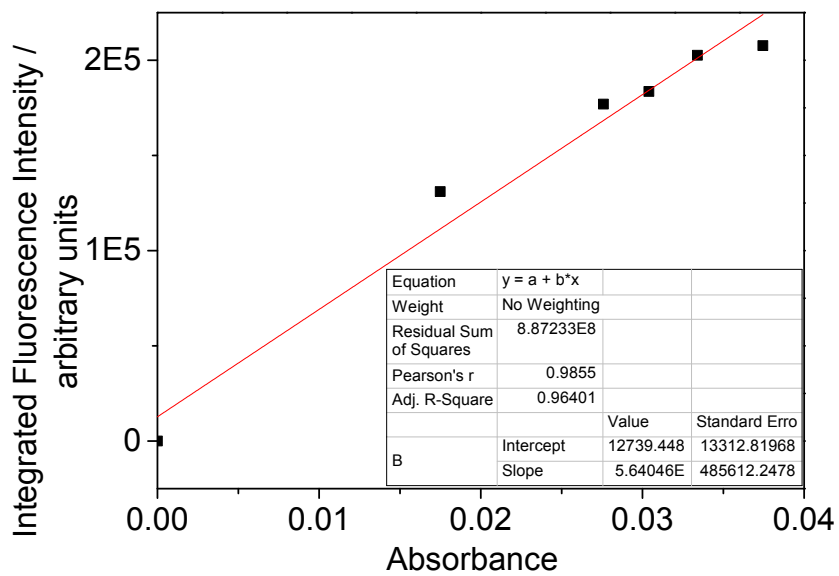

**Fig. S2** The linear plot for Rhodamine B in ethanol (90%, 400 nm excitation).

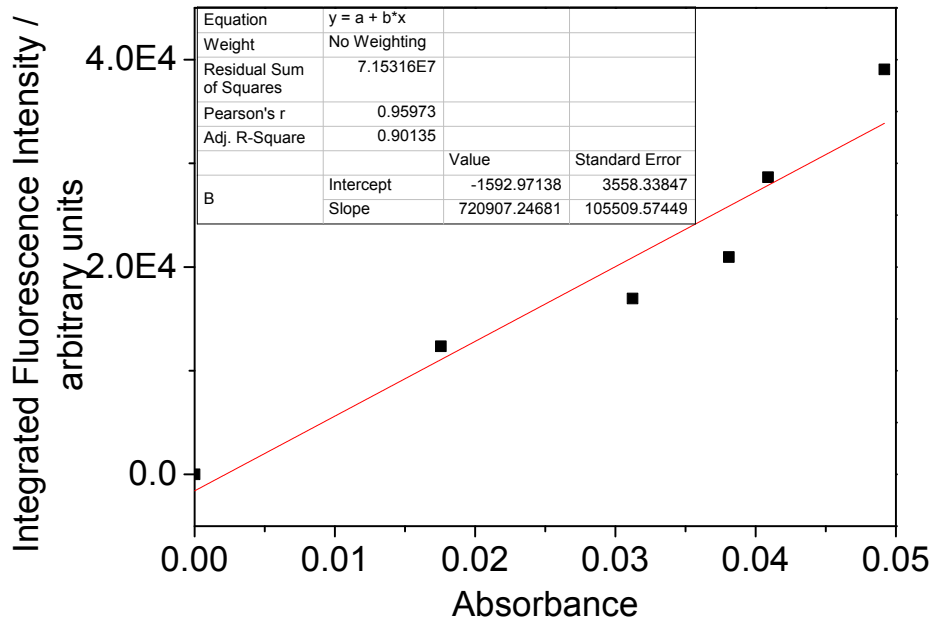

**Fig. S3** The linear plot for TPNS sample.

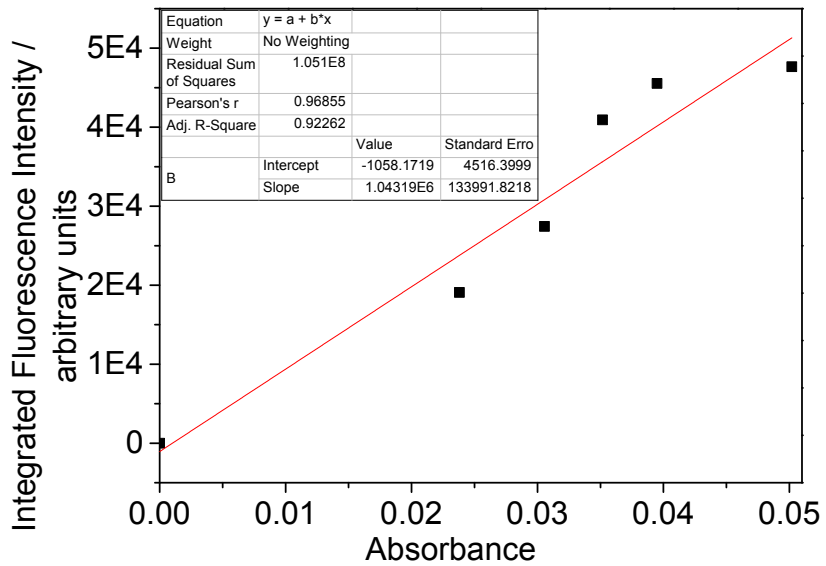

**Fig. S4** The linear plot for H-TPNS sample.

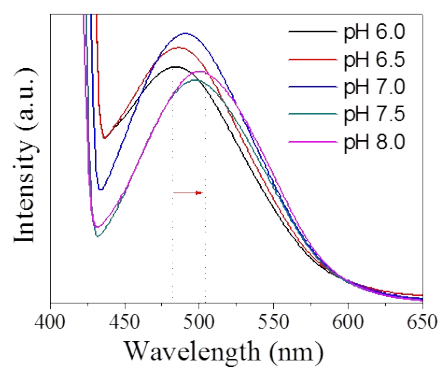

**Fig. S5** The fluorescent spectra of TPNS at different pHs.

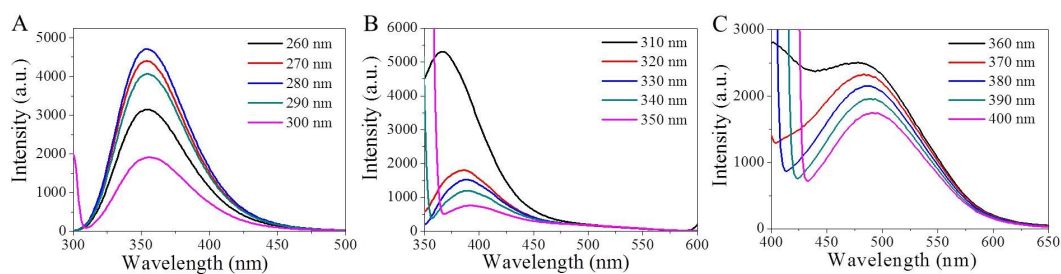

**Fig. S6** The fluorescent spectra of TPNS under different excitation wavelengths.

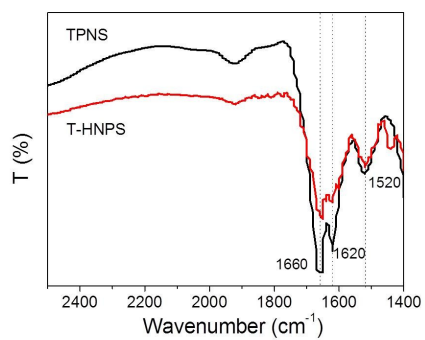

**Fig. S7** FT-IR spectra of TPNS and T-HNPS.

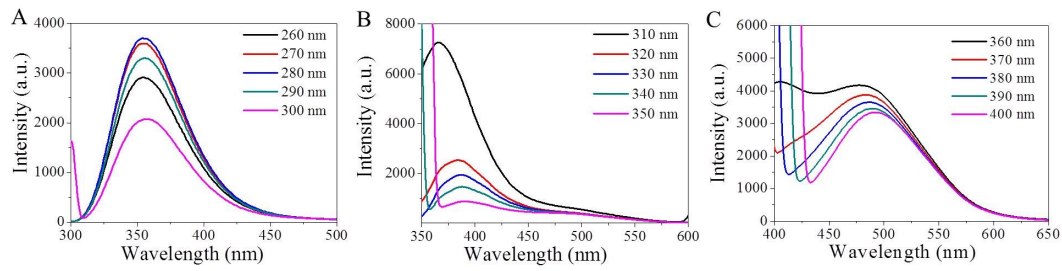

**Fig. S8** The fluorescent spectra of H-TPNS under different excitation wavelengths.

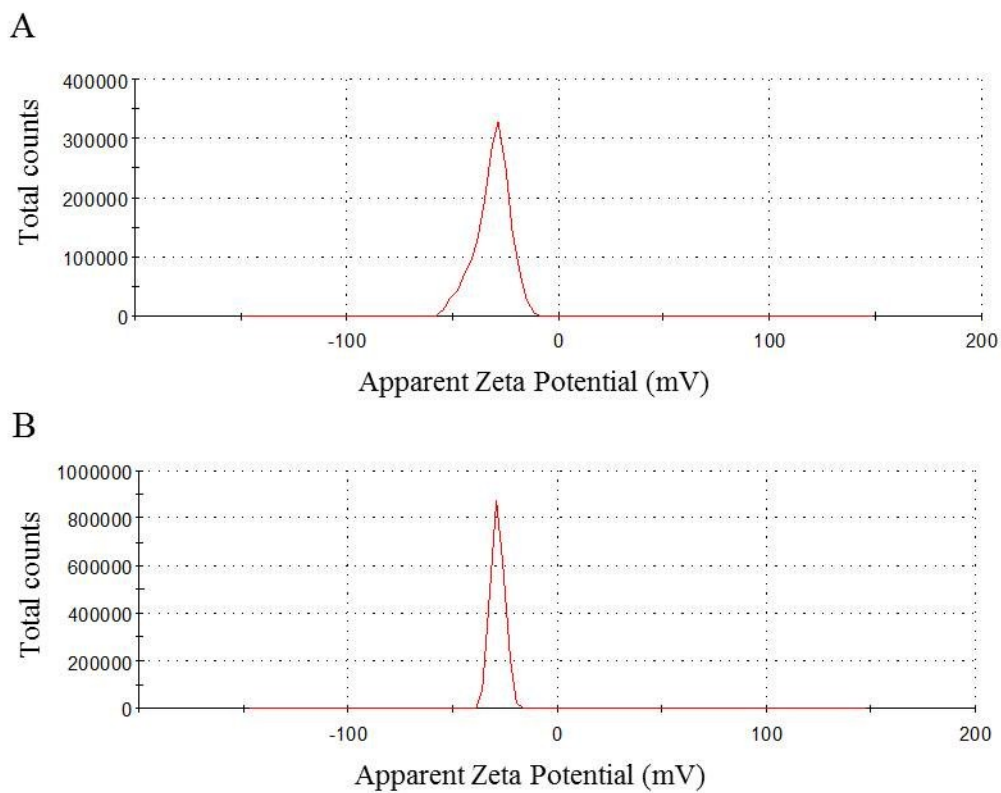

**Fig. S9**  $\zeta$ -potentials of TPNS (A) and H-TPNS nanoprobes (B).
